# Supplementary material for: Unveiling the Effect of Low pH on the SARS-CoV-2 Main Protease by Molecular Dynamics Simulations
Source: MDPI journal article supplement (doi:10.3390/polym13213823), 2021-11-05
Supplement: s1 [file s1]

# Supporting Information:

## Unveiling the Effect of Low pH on the SARS-CoV-2 Main Protease by Molecular Dynamics Simulations

Haruna L. Barazorda-Ccahuana,<sup>†,‡</sup> Miroslava Nedyalkova,<sup>¶</sup> Francesc Mas,<sup>\*,†</sup> and  
Sergio Madurga<sup>\*,†</sup>

<sup>†</sup>*Materials Science and Physical Chemistry Department & Research Institute of Theoretical  
and Computational Chemistry (IQTCUB), University of Barcelona, Barcelona, Spain*

<sup>‡</sup>*Vicerrectorado de Investigación, Universidad Católica de Santa María, Arequipa, Perú*

<sup>¶</sup>*Department of Inorganic Chemistry, University of Sofia “St. Kl. Okhridski”, Sofia,  
Bulgaria*

E-mail: fmas@ub.edu; s.madurga@ub.edu

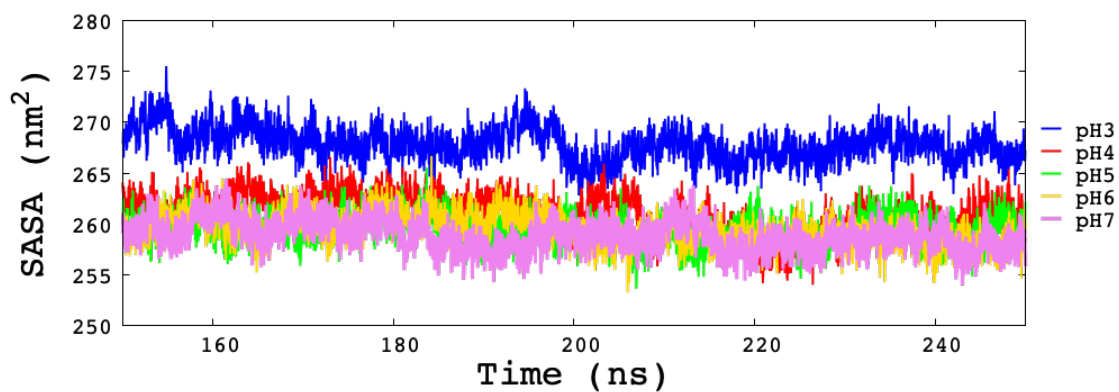

(a)

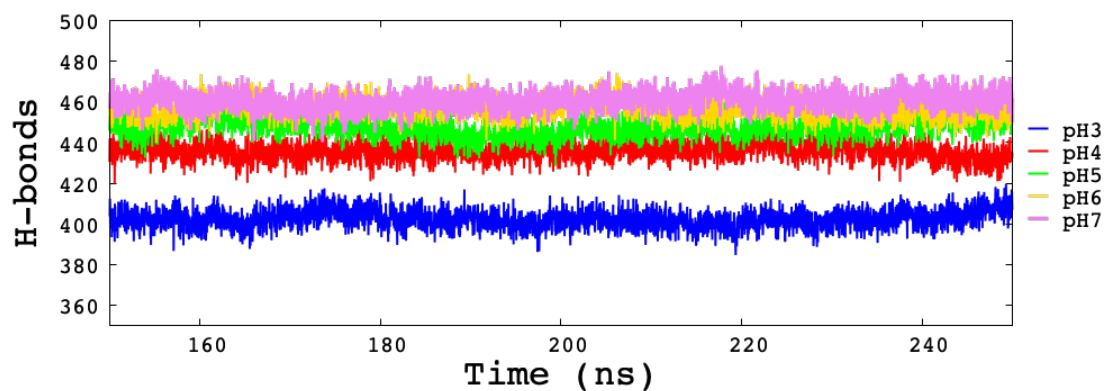

(b)

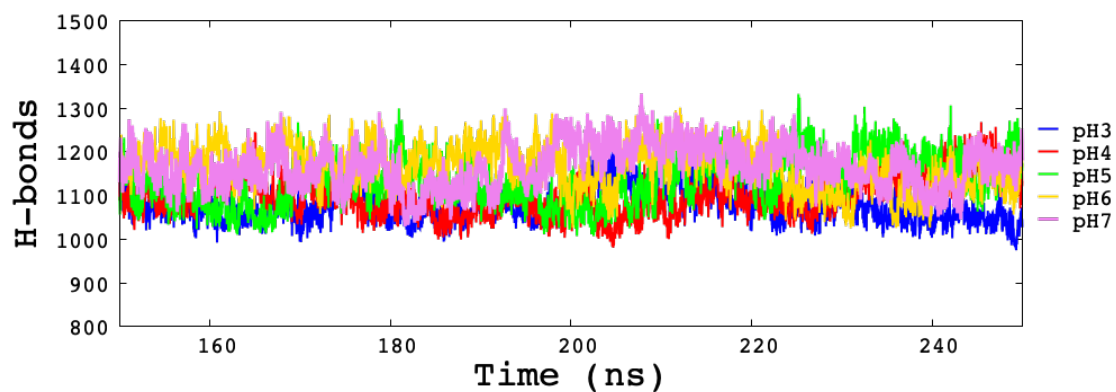

(c)

**Figure S1.** Plot of hydrogen bonds and SASA during the time of MD simulations at different pHs. (a) Solvent Accessible Surface Area. (b) Intramolecular Hydrogen bonds between protein-protein. (c) Intermolecular Hydrogen bonds between protein-waters.

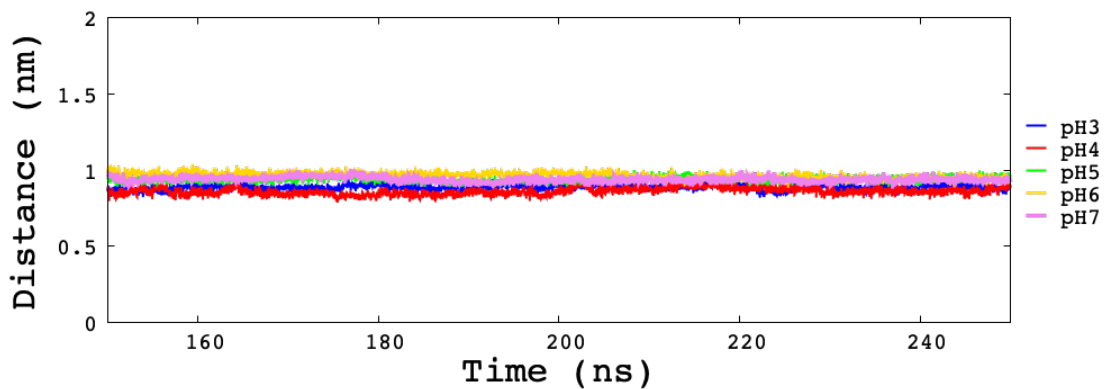

(a)

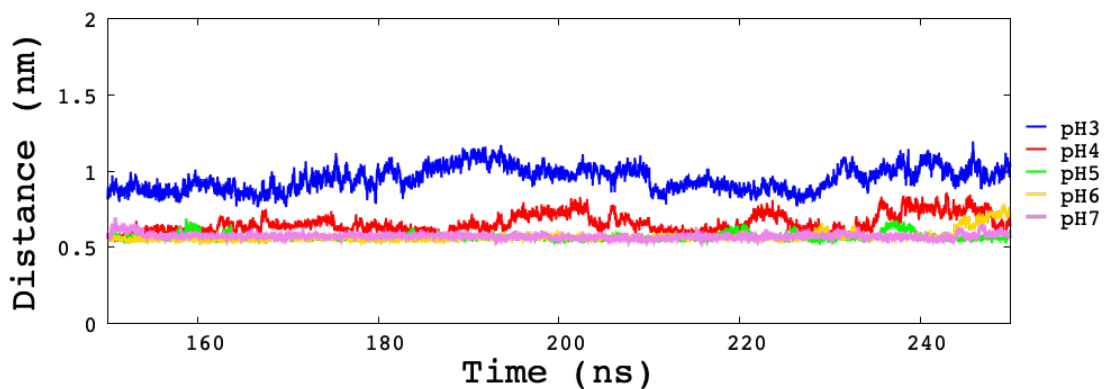

(b)

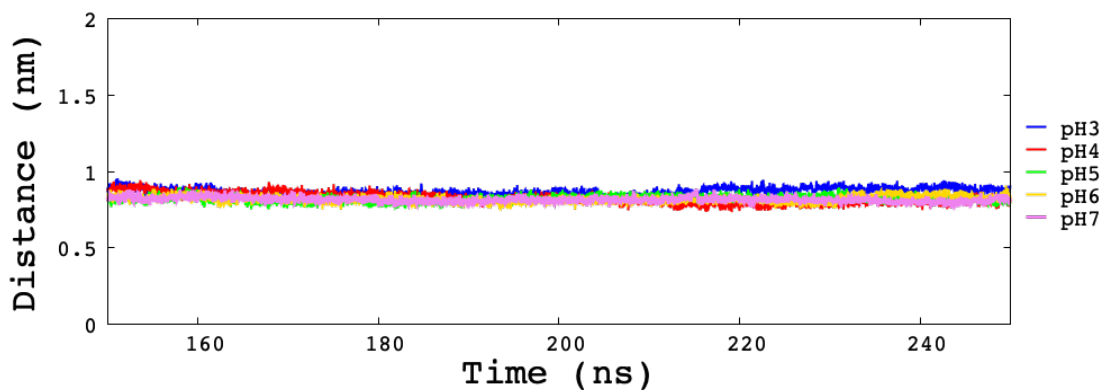

(c)

**Figure S2.** Distances between C- $\alpha$  atoms from residues of the active site (Cys145 and His41) and S1 pocket in Mpro. (a) Average distance Cys145-His41. (b) Average distance of Met49-Gln189. (c) Average distance of His172-Phe140.

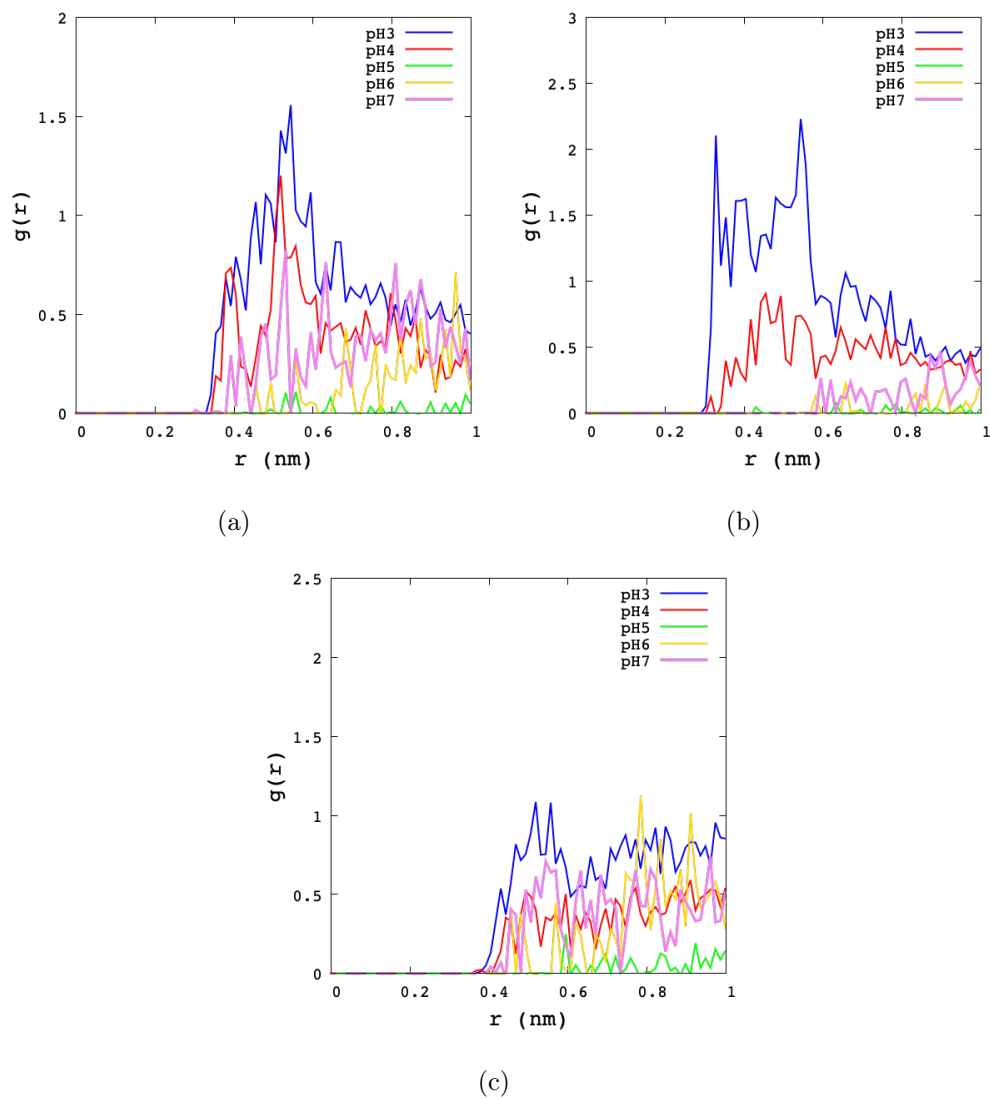

**Figure S3.** Radial Distribution of active site residues against Mpro. (a)  $S\gamma$ -ions of Cys145.(b)  $N\delta 1$ -ions of His41. (c)  $S\gamma$ -ions of Met49.

**Table S1.** Total charge of each titratable amino acids.

| <b>pH3</b>      |                 |                 |                 |                 |                 |                 |                 |                 |                 |                  |                      |
|-----------------|-----------------|-----------------|-----------------|-----------------|-----------------|-----------------|-----------------|-----------------|-----------------|------------------|----------------------|
| <b>Residues</b> | <b>MicroS-1</b> | <b>MicroS-2</b> | <b>MicroS-3</b> | <b>MicroS-4</b> | <b>MicroS-5</b> | <b>MicroS-6</b> | <b>MicroS-7</b> | <b>MicroS-8</b> | <b>MicroS-9</b> | <b>MicroS-10</b> | <b>Average value</b> |
| ASP (34)        | -11             | -9              | -9              | -8              | -8              | -8              | -9              | -7              | -10             | -8               | -(9±1)               |
| GLU (18)        | -5              | -5              | -3              | -4              | -3              | -3              | -3              | -6              | -5              | -5               | -(4±1)               |
| ARG (22)        | 22              | 22              | 22              | 22              | 22              | 22              | 22              | 22              | 22              | 22               | 22                   |
| LYS (22)        | 22              | 22              | 22              | 22              | 22              | 22              | 22              | 22              | 22              | 22               | 22                   |
| HIS (14)        | 10              | 10              | 9               | 10              | 10              | 10              | 10              | 10              | 10              | 10               | 10                   |
| <b>pH4</b>      |                 |                 |                 |                 |                 |                 |                 |                 |                 |                  |                      |
| <b>Residues</b> | <b>MicroS-1</b> | <b>MicroS-2</b> | <b>MicroS-3</b> | <b>MicroS-4</b> | <b>MicroS-5</b> | <b>MicroS-6</b> | <b>MicroS-7</b> | <b>MicroS-8</b> | <b>MicroS-9</b> | <b>MicroS-10</b> | <b>Average</b>       |
| ASP (34)        | -21             | -21             | -27             | -22             | -22             | -24             | -20             | -26             | -22             | -24              | -(23±2)              |
| GLU (18)        | -6              | -6              | -6              | -9              | -8              | -8              | -6              | -6              | -7              | -6               | -(7±1)               |
| ARG (22)        | 22              | 22              | 22              | 22              | 22              | 22              | 22              | 22              | 22              | 22               | 22                   |
| LYS (22)        | 22              | 22              | 22              | 22              | 22              | 22              | 22              | 22              | 22              | 22               | 22                   |
| HIS (14)        | 9               | 10              | 9               | 9               | 9               | 9               | 9               | 10              | 8               | 8                | 9±1                  |
| <b>pH5</b>      |                 |                 |                 |                 |                 |                 |                 |                 |                 |                  |                      |
| <b>Residues</b> | <b>MicroS-1</b> | <b>MicroS-2</b> | <b>MicroS-3</b> | <b>MicroS-4</b> | <b>MicroS-5</b> | <b>MicroS-6</b> | <b>MicroS-7</b> | <b>MicroS-8</b> | <b>MicroS-9</b> | <b>MicroS-10</b> | <b>Average</b>       |
| ASP (34)        | -32             | -30             | -34             | -33             | -31             | -33             | -30             | -34             | -33             | -32              | -(32±1)              |
| GLU (18)        | -9              | -13             | -7              | -9              | -12             | -11             | -15             | -10             | -12             | -10              | -(11±2)              |
| ARG (22)        | 22              | 22              | 22              | 22              | 22              | 22              | 22              | 22              | 22              | 22               | 22                   |
| LYS (22)        | 22              | 22              | 22              | 22              | 22              | 22              | 22              | 22              | 22              | 22               | 22                   |
| HIS (14)        | 6               | 5               | 7               | 5               | 3               | 7               | 4               | 7               | 5               | 7                | 6±1                  |
| <b>pH6</b>      |                 |                 |                 |                 |                 |                 |                 |                 |                 |                  |                      |
| <b>Residues</b> | <b>MicroS-1</b> | <b>MicroS-2</b> | <b>MicroS-3</b> | <b>MicroS-4</b> | <b>MicroS-5</b> | <b>MicroS-6</b> | <b>MicroS-7</b> | <b>MicroS-8</b> | <b>MicroS-9</b> | <b>MicroS-10</b> | <b>Average</b>       |
| ASP (34)        | -34             | -34             | -34             | -33             | -33             | -34             | -34             | -34             | -34             | -33              | -(34±1)              |
| GLU (18)        | -16             | -16             | -14             | -16             | -15             | -16             | -17             | -17             | -15             | -16              | -(16±1)              |
| ARG (22)        | 22              | 22              | 22              | 22              | 22              | 22              | 22              | 22              | 22              | 22               | 22                   |
| LYS (22)        | 22              | 22              | 22              | 22              | 22              | 22              | 22              | 22              | 22              | 22               | 22                   |
| HIS (14)        | 2               | 3               | 2               | 3               | 1               | 2               | 1               | 2               | 3               | 1                | 2±1                  |
| <b>pH7</b>      |                 |                 |                 |                 |                 |                 |                 |                 |                 |                  |                      |
| <b>Residues</b> | <b>MicroS-1</b> | <b>MicroS-2</b> | <b>MicroS-3</b> | <b>MicroS-4</b> | <b>MicroS-5</b> | <b>MicroS-6</b> | <b>MicroS-7</b> | <b>MicroS-8</b> | <b>MicroS-9</b> | <b>MicroS-10</b> | <b>Average</b>       |
| ASP (34)        | -34             | -34             | -34             | -34             | -34             | -34             | -34             | -34             | -34             | -34              | -34                  |
| GLU (18)        | -17             | -17             | -17             | -16             | -17             | -17             | -16             | -17             | -18             | -18              | -(17±1)              |
| ARG (22)        | 22              | 22              | 22              | 22              | 22              | 22              | 22              | 22              | 22              | 22               | 22                   |
| LYS (22)        | 22              | 22              | 22              | 22              | 22              | 22              | 22              | 22              | 22              | 22               | 22                   |
| HIS (14)        | 1               | 0               | 0               | 0               | 1               | 2               | 0               | 0               | 1               | 1                | 1±1                  |

**Table S2.** Protonate/deprotonate microstate of His41 and His172. The symbol P and D define the protonated and deprotonated states, respectively.

| Residue | MicroS | pH3                 | pH4                 | pH5                 | pH6                 | pH7                 |
|---------|--------|---------------------|---------------------|---------------------|---------------------|---------------------|
| His41   | 1      | chainA(P)/chainB(P) | chainA(P)/chainB(D) | chainA(D)/chainB(D) | chainA(D)/chainB(D) | chainA(D)/chainB(D) |
|         | 2      | chainA(P)/chainB(P) | chainA(P)/chainB(P) | chainA(D)/chainB(D) | chainA(D)/chainB(D) | chainA(D)/chainB(D) |
|         | 3      | chainA(D)/chainB(P) | chainA(D)/chainB(P) | chainA(P)/chainB(P) | chainA(D)/chainB(D) | chainA(D)/chainB(D) |
|         | 4      | chainA(P)/chainB(P) | chainA(P)/chainB(P) | chainA(D)/chainB(D) | chainA(D)/chainB(D) | chainA(D)/chainB(D) |
| His172  | 1      | chainA(P)/chainB(P) | chainA(P)/chainB(P) | chainA(P)/chainB(P) | chainA(D)/chainB(D) | chainA(D)/chainB(D) |
|         | 2      | chainA(P)/chainB(P) | chainA(P)/chainB(P) | chainA(D)/chainB(D) | chainA(D)/chainB(D) | chainA(D)/chainB(D) |
|         | 3      | chainA(P)/chainB(P) | chainA(P)/chainB(P) | chainA(D)/chainB(D) | chainA(D)/chainB(D) | chainA(D)/chainB(D) |
|         | 4      | chainA(P)/chainB(P) | chainA(P)/chainB(P) | chainA(D)/chainB(D) | chainA(D)/chainB(D) | chainA(D)/chainB(D) |

**Table S3.** Values of the MD was fitted against the average structure of the last 100 ns of the dynamics was used.

| pH  | MicroS  | RMSD<br>(nm) | RG<br>(nm)  | SASA<br>(nm <sup>2</sup> ) | Hbond<br>(protein-protein) | Hbond<br>(protein-waters) |
|-----|---------|--------------|-------------|----------------------------|----------------------------|---------------------------|
| pH3 | pH3-1   | 0.28±0.02    | 2.543±0.009 | 269±3                      | 404±9                      | (111±9)x10                |
|     | pH3-2   | 0.21±0.02    | 2.561±0.011 | 269±3                      | 409±10                     | (103±5)x10                |
|     | pH3-3   | 0.32±0.05    | 2.543±0.019 | 266±5                      | 393±10                     | (110±8)x10                |
|     | pH3-4   | 0.24±0.02    | 2.562±0.008 | 267±3                      | 405±9                      | (109±9)x10                |
|     | Average | 0.26±0.06    | 2.553±0.010 | 268±2                      | 401±1                      | (107±4)x10                |
| pH4 | pH4-1   | 0.22±0.02    | 2.537±0.008 | 261±3                      | 438±10                     | (109±10)x10               |
|     | pH4-2   | 0.21±0.02    | 2.538±0.008 | 262±3                      | 427±9                      | (110±10)x10               |
|     | pH4-3   | 0.18±0.02    | 2.536±0.008 | 259±3                      | 447±10                     | (109±9)x10                |
|     | pH4-4   | 0.21±0.02    | 2.541±0.009 | 263±4                      | 432±10                     | (112±10)x10               |
|     | Average | 0.20±0.02    | 2.538±0.002 | 261±2                      | 437±10                     | (110±2)x10                |
| pH5 | pH5-1   | 0.25±0.03    | 2.532±0.009 | 258±3                      | 448±9                      | (122±15)x10               |
|     | pH5-2   | 0.24±0.02    | 2.542±0.008 | 262±3                      | 450±10                     | (109±9)x10                |
|     | pH5-3   | 0.24±0.02    | 2.518±0.008 | 256±3                      | 445±10                     | (107±9)x10                |
|     | pH5-4   | 0.18±0.02    | 2.537±0.008 | 262±3                      | 449±9                      | (115±11)x10               |
|     | Average | 0.21±0.04    | 2.537±0.005 | 259±3                      | 448±3                      | (114±8)x10                |
| pH6 | pH6-1   | 0.18±0.01    | 2.534±0.007 | 261±3                      | 462±9                      | (102±2)x10                |
|     | pH6-2   | 0.22±0.01    | 2.527±0.007 | 258±3                      | 450±9                      | (122±10)x10               |
|     | pH6-3   | 0.20±0.02    | 2.534±0.008 | 259±3                      | 452±9                      | (126±12)x10               |
|     | pH6-4   | 0.21±0.02    | 2.537±0.008 | 259±3                      | 458±8                      | (116±11)x10               |
|     | Average | 0.20±0.02    | 2.532±0.005 | 260±2                      | 456±6                      | (114±12)x10               |
| pH7 | pH7-1   | 0.16±0.02    | 2.533±0.010 | 259±3                      | 460±10                     | (102±2)x10                |
|     | pH7-2   | 0.21±0.02    | 2.526±0.008 | 258±3                      | 462±9                      | (126±10)x10               |
|     | pH7-3   | 0.21±0.03    | 2.528±0.008 | 260±3                      | 460±9                      | (118±12)x10               |
|     | pH7-4   | 0.19±0.01    | 2.519±0.006 | 258±3                      | 461±10                     | (121±12)x10               |
|     | Average | 0.19±0.02    | 2.526±0.007 | 259±1                      | 461±1                      | (114±12)x10               |

**Table S4.** Distances between amino acids from the catalytic dyad for each microstate.

| pH  | MicroS  | His41-Cys145 | Met49-Cys145 | His172-Cys145 |
|-----|---------|--------------|--------------|---------------|
| pH3 | pH3-1   | 0.74±0.10    | 2.50±0.09    | 0.94±0.10     |
|     | pH3-2   | 0.71±0.11    | 1.59±0.18    | 0.93±0.16     |
|     | pH3-3   | 0.65±0.06    | 1.39±0.04    | 0.67±0.09     |
|     | pH3-4   | 0.50±0.03    | 1.37±0.05    | 0.85±0.04     |
|     | Average | 0.65±0.04    | 1.71±0.05    | 0.85±0.05     |
| pH4 | pH4-1   | 0.61±0.08    | 1.62±0.14    | 1.20±0.04     |
|     | pH4-2   | 0.68±0.09    | 1.31±0.08    | 1.13±0.13     |
|     | pH4-3   | 0.57±0.07    | 1.53±0.19    | 1.21±0.06     |
|     | pH4-4   | 0.60±0.07    | 1.39±0.05    | 1.11±0.14     |
|     | Average | 0.62±0.04    | 1.46±0.07    | 1.16±0.05     |
| pH5 | pH5-1   | 0.55±0.04    | 1.41±0.06    | 0.91±0.06     |
|     | pH5-2   | 0.59±0.06    | 1.41±0.06    | 0.72±0.08     |
|     | pH5-3   | 0.53±0.06    | 1.43±0.07    | 0.68±0.12     |
|     | pH5-4   | 0.54±0.07    | 1.43±0.06    | 0.87±0.12     |
|     | Average | 0.55±0.03    | 1.42±0.03    | 0.79±0.05     |
| pH6 | pH6-1   | 0.54±0.08    | 1.43±0.06    | 1.06±0.07     |
|     | pH6-2   | 0.56±0.08    | 1.41±0.06    | 0.70±0.10     |
|     | pH6-3   | 0.54±0.06    | 1.41±0.07    | 0.89±0.10     |
|     | pH6-4   | 0.48±0.05    | 1.49±0.05    | 1.00±0.06     |
|     | Average | 0.53±0.03    | 1.43±0.03    | 0.91±0.04     |
| pH7 | pH7-1   | 0.52±0.06    | 1.40±0.06    | 0.97±0.11     |
|     | pH7-2   | 0.50±0.06    | 1.46±0.07    | 0.93±0.08     |
|     | pH7-3   | 0.50±0.08    | 1.39±0.07    | 0.94±0.06     |
|     | pH7-4   | 0.54±0.03    | 1.38±0.06    | 0.81±0.05     |
|     | Average | 0.51±0.03    | 1.41±0.03    | 0.91±0.04     |



**Table S5.** Numerical values of Ramachandran plot of the last frame of each microstate determined by Molprobity server.

|     | MicroS | Poor rotamers | Favored rotamers | Ramachandran outliers | Ramachandran favored | Favored | Allowed |     |        |        |         |
|-----|--------|---------------|------------------|-----------------------|----------------------|---------|---------|-----|--------|--------|---------|
| pH3 | pH3-1  | 9             | 1.80%            | 452                   | 90.40%               | 6       | 0.99%   | 563 | 93.21% | 93.20% | 99.00%  |
|     | pH3-2  | 13            | 2.60%            | 456                   | 91.20%               | 5       | 0.83%   | 564 | 93.38% | 93.40% | 99.20%  |
|     | pH3-3  | 13            | 2.60%            | 456                   | 91.20%               | 7       | 1.16%   | 565 | 93.54% | 93.50% | 98.80%  |
|     | pH3-4  | 10            | 2.00%            | 452                   | 90.40%               | 6       | 0.99%   | 567 | 93.87% | 93.90% | 99.00%  |
| pH4 | pH4-1  | 11            | 2.20%            | 455                   | 91.00%               | 6       | 0.99%   | 565 | 93.54% | 93.50% | 99.00%  |
|     | pH4-2  | 10            | 2.00%            | 450                   | 90.00%               | 5       | 0.83%   | 568 | 94.04% | 94.00% | 99.20%  |
|     | pH4-3  | 13            | 2.60%            | 445                   | 89.00%               | 4       | 0.66%   | 558 | 92.38% | 92.40% | 99.30%  |
|     | pH4-4  | 10            | 2.00%            | 449                   | 89.80%               | 4       | 0.66%   | 567 | 93.87% | 93.90% | 99.30%  |
| pH5 | pH5-1  | 15            | 3.00%            | 450                   | 90.00%               | 2       | 0.33%   | 552 | 91.39% | 91.40% | 99.70%  |
|     | pH5-2  | 14            | 2.80%            | 449                   | 89.80%               | 2       | 0.33%   | 562 | 93.05% | 93.00% | 99.70%  |
|     | pH5-3  | 14            | 2.80%            | 454                   | 90.80%               | 7       | 1.16%   | 553 | 91.56% | 91.60% | 98.80%  |
|     | pH5-4  | 11            | 2.20%            | 459                   | 91.80%               | 2       | 0.33%   | 555 | 91.89% | 91.90% | 99.70%  |
| pH6 | pH6-1  | 19            | 3.80%            | 439                   | 87.80%               | 8       | 1.32%   | 556 | 92.05% | 92.10% | 98.70%  |
|     | pH6-2  | 13            | 2.60%            | 454                   | 90.80%               | 6       | 0.99%   | 564 | 93.38% | 93.40% | 99.00%  |
|     | pH6-3  | 8             | 1.60%            | 451                   | 90.20%               | 8       | 1.32%   | 554 | 91.72% | 91.70% | 98.70%  |
|     | pH6-4  | 12            | 2.40%            | 451                   | 90.20%               | 5       | 0.83%   | 554 | 91.72% | 91.70% | 99.20%  |
| pH7 | pH7-1  | 13            | 2.60%            | 448                   | 89.60%               | 3       | 0.50%   | 554 | 91.72% | 91.70% | 99.50%  |
|     | pH7-2  | 17            | 3.40%            | 457                   | 91.40%               | 0       | 0.00%   | 562 | 93.05% | 93.00% | 100.00% |
|     | pH7-3  | 10            | 2.00%            | 450                   | 90.00%               | 5       | 0.83%   | 554 | 91.72% | 91.70% | 99.20%  |
|     | pH7-4  | 7             | 1.40%            | 466                   | 93.20%               | 5       | 0.83%   | 556 | 92.05% | 92.10% | 99.20%  |

**Table S6.** Docking results of each microstate at different pHs.

| Name    | Size x (Å) | Size y (Å) | Size z (Å) | Search Domain Volume (Å <sup>3</sup> ) | Number of flexible side chains |
|---------|------------|------------|------------|----------------------------------------|--------------------------------|
| ph3-2-a | 39.2       | 31.4       | 31.7       | 39018.896                              | 32                             |
| ph3-2-b | 40         | 33.2       | 32         | 42496                                  | 32                             |
| ph3-3-a | 34.3       | 31.6       | 37.7       | 40862.276                              | 32                             |
| ph3-3-b | 38.4       | 33.8       | 27.8       | 36082.176                              | 33                             |
| ph3-4-a | 30.8       | 28.7       | 35.1       | 31026.996                              | 32                             |
| ph3-4-b | 31.6       | 33         | 31.9       | 33265.32                               | 28                             |
| ph3-a   | 29.4       | 44         | 33.9       | 43853.04                               | 27                             |
| ph3-b   | 42.7       | 37.9       | 33.6       | 54375.888                              | 30                             |
| ph4-2-a | 29.9       | 36.4       | 30.4       | 33086.144                              | 28                             |
| ph4-2-b | 31         | 29.5       | 29.8       | 27252.1                                | 29                             |
| ph4-3-a | 27.8       | 34.5       | 30.5       | 29252.55                               | 27                             |
| ph4-3-b | 28.9       | 30         | 33.3       | 28871.1                                | 28                             |
| ph4-4-a | 27.9       | 33.9       | 27.5       | 26009.775                              | 29                             |
| ph4-4-b | 29.8       | 29.2       | 37.7       | 32805.032                              | 29                             |
| ph4-a   | 40         | 38         | 43         | 65360                                  | 31                             |
| ph4-b   | 37         | 40         | 48.1       | 71188                                  | 32                             |
| ph5-2-a | 35         | 31.6       | 32         | 35392                                  | 30                             |
| ph5-2-b | 32.1       | 36.2       | 35         | 40670.7                                | 30                             |
| ph5-3-a | 30.6       | 26.1       | 32.5       | 25956.45                               | 31                             |
| ph5-3-b | 28         | 32.2       | 37.8       | 34080.48                               | 30                             |
| ph5-4-a | 35.2       | 34.8       | 27.5       | 33686.4                                | 30                             |
| ph5-4-b | 25.8       | 32.5       | 31.8       | 26664.3                                | 31                             |
| ph5-a   | 37.9       | 37.1       | 47.5       | 66789.275                              | 30                             |
| ph5-b   | 37.2       | 37.8       | 37.8       | 53152.848                              | 30                             |
| ph6-2-a | 28.3       | 28.5       | 34.8       | 28067.94                               | 30                             |
| ph6-2-b | 30.6       | 32.2       | 30.5       | 30052.26                               | 29                             |
| ph6-3-a | 30.8       | 34.9       | 33.2       | 35687.344                              | 28                             |
| ph6-3-b | 36.8       | 30.9       | 30.7       | 34909.584                              | 29                             |
| ph6-4-a | 30.2       | 28.5       | 43         | 37010.1                                | 30                             |
| ph6-4-b | 30.2       | 31.5       | 32.4       | 30822.12                               | 30                             |
| ph6-a   | 36         | 37.6       | 36.8       | 49812.48                               | 30                             |
| ph6-b   | 34         | 32.1       | 46.6       | 50859.24                               | 31                             |
| ph7-2-a | 30         | 28.3       | 33.4       | 28356.6                                | 30                             |
| ph7-2-b | 33.9       | 37.7       | 28.8       | 36807.264                              | 29                             |
| ph7-3-a | 30         | 26.4       | 37.6       | 29779.2                                | 30                             |
| ph7-3-b | 35.3       | 28.1       | 26         | 25790.18                               | 31                             |
| ph7-4-a | 25.9       | 34.8       | 30.8       | 27760.656                              | 31                             |
| ph7-4-b | 32.8       | 29.3       | 32.5       | 31233.8                                | 31                             |
| ph7-a   | 37         | 34.5       | 45.7       | 58336.05                               | 30                             |
| ph7-b   | 45.2       | 41         | 35         | 64862                                  | 31                             |

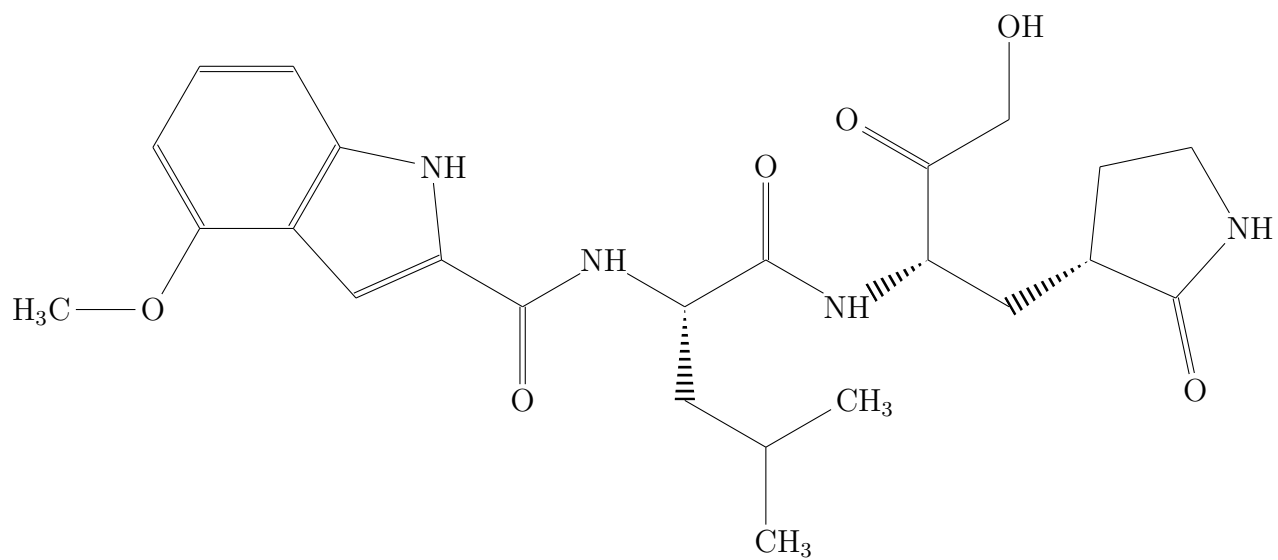

**Figure S4.** 2D representation of PF-00835231.

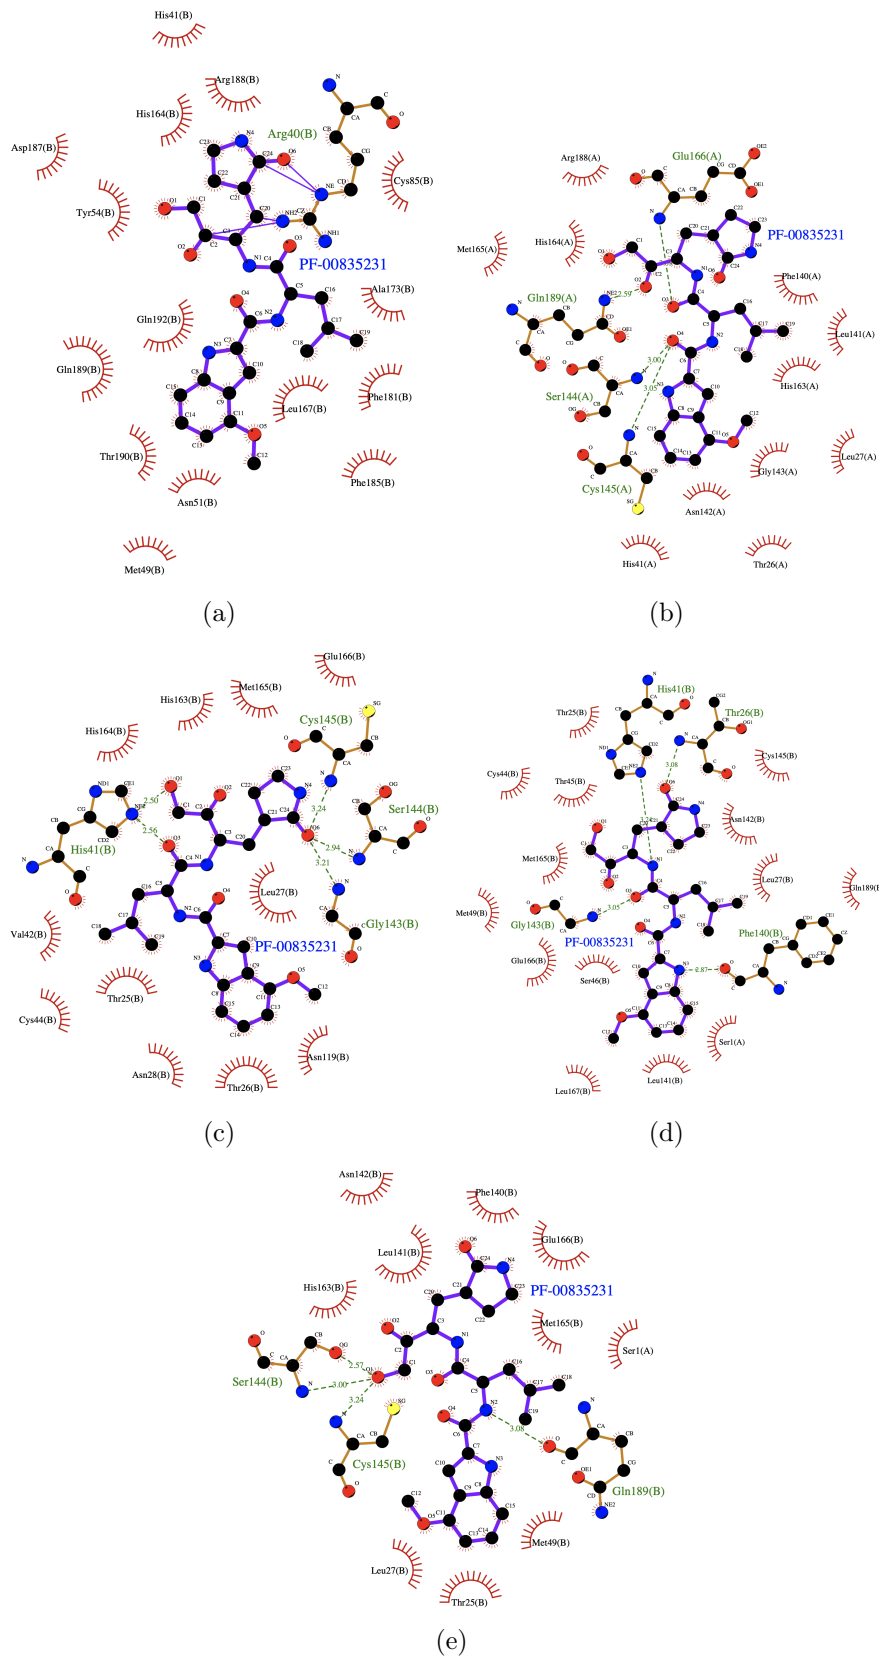

**Figure S5.** 2D representation of the best binding affinity Mpro–PF-00835231 . (a) pH3. (b) pH4. (c) pH5. (d) pH6. (e) pH7.
